# Supplementary material for: Obesity in Inflammatory Bowel Disease: Gains in Adiposity despite High Prevalence of Myopenia and Osteopenia
Source: PubMed Central journal article supplement (PMC6163971; doi:10.3390/nu10091192), 2018-09-01
Supplement: nutrients-10-01192-s001.pdf [file nutrients-10-01192-s001.pdf]

## Supplementary Materials

Supplementary Table 1: Baseline clinical and nutritional characteristics of IBD Cohort

|                                            |               | Overall                                  | Crohn's disease                         | Ulcerative colitis                      |
|--------------------------------------------|---------------|------------------------------------------|-----------------------------------------|-----------------------------------------|
| <b>Patients (n)</b>                        |               | 154                                      | 108 (70%)                               | 46 (30%)                                |
| <b>Ethnicity</b>                           | Caucasian     | 145 (94%)                                | 105 (97%)                               | 40 (87%)                                |
|                                            | Asian         | 6 (4%)                                   | 2 (2%)                                  | 4 (9%)                                  |
|                                            | Black         | 3 (2%)                                   | 1 (1%)                                  | 2 (4%)                                  |
| <b>Male (n, %)</b>                         |               | 85 (55%)                                 | 56 (52%)                                | 29 (63%)                                |
| <b>Age (years) (median, IQR)</b>           |               | 31 (25-40)                               | 31 (27-41)                              | 31 (23-40)                              |
| <b>Smoking</b>                             | Current       | 32 (21%)                                 | 29 (27%)                                | 2 (4%)                                  |
|                                            | Ex-smoker     | 39 (25%)                                 | 29 (27%)                                | 10 (22%)                                |
|                                            | Never smoked  | 83 (54%)                                 | 50 (46%)                                | 33 (72%)                                |
| <b>Alcohol use (&gt;20g ethanol/day)</b>   |               | 6 (4%)                                   | 4 (3%)                                  | 2 (1%)                                  |
| <b>Age at IBD diagnosis (median, IQR)</b>  |               | 22 (17-29)                               | 21 (17-27)                              | 24 (17-30)                              |
| <b>Montreal criteria</b>                   |               | A1 31 (20%)<br>A2 116 (75%)<br>A3 7 (5%) | A1 20 (19%)<br>A2 82 (76%)<br>A3 6 (5%) | A1 11 (24%)<br>A2 34 (74%)<br>A3 1 (2%) |
| <b>IBD disease duration (months)</b>       | Mean $\pm$ SD | 113 $\pm$ 88                             | 122.2 $\pm$ 90                          | 92 $\pm$ 79                             |
|                                            | Median, IQR   | 92 (54-148)                              | 101 (59-150)                            | 72 (42- 119)                            |
| <b>IBD phenotype<br/>Montreal criteria</b> |               |                                          | L1 33 (31%)    B1 50 (46%)              | E1 2 (4%)                               |
|                                            |               |                                          | L2 36 (33%)    B2 40 (37%)              | E2 13 (28%)                             |
|                                            |               |                                          | L3 39 (36%)    B3 18 (14%)              | E3 31 (67%)                             |
| <b>Extra-intestinal manifestations</b>     | Overall       | 40 (26%)                                 | 26 (24%)                                | 14 (30%)                                |
|                                            | PSC           | 9 (6%)                                   | 5 (5%)                                  | 4 (9%)                                  |
|                                            | Arthropathy   | 17 (11%)                                 | 12 (11%)                                | 5 (11%)                                 |
|                                            | Skin lesion   | 8 (5%)                                   | 6 (6%)                                  | 2 (4%)                                  |
|                                            | Other         | 6 (4%)                                   | 3 (3%)                                  | 3 (7%)                                  |

|                                                                           |                                                                                     |                                                      |                                                                                                                                                              |                                                    |
|---------------------------------------------------------------------------|-------------------------------------------------------------------------------------|------------------------------------------------------|--------------------------------------------------------------------------------------------------------------------------------------------------------------|----------------------------------------------------|
| <b>IBD-related surgery</b>                                                |                                                                                     |                                                      | - Overall 44 (41%)<br>- Ileal/small bowel resection 30 (28%)<br>- Ileocolonic resection 10 (9%)<br>- Colectomy 4 (4%)<br>- Multiple prior surgeries 11 (10%) | - Overall 1 (2%)<br>Colectomy 1 (2%)               |
| <b>IBD Clinical disease activity score</b>                                | Mean $\pm$ SD<br>Median, IQR                                                        |                                                      | CDAI 95 $\pm$ 98<br>68 (26-138)                                                                                                                              | Partial Mayo 1.8 $\pm$ 2.6<br>0 (0-4)              |
| <b>C-reactive protein (mg/L)</b>                                          | Mean $\pm$ SD<br>Median, IQR                                                        | 8.42 $\pm$ 20<br>1.95 (0.5- 8.4)                     | 10 $\pm$ 23<br>2.3 (0.5-11)                                                                                                                                  | 3.6 $\pm$ 6<br>1.0 (0.3- 2.9)                      |
| <b>Faecal calprotectin (<math>\mu</math>g/g)</b>                          | Mean $\pm$ SD<br>Median, IQR                                                        | 233.6 $\pm$ 269<br>135 (20-273)                      | 240 $\pm$ 294<br>86 (20-430)                                                                                                                                 | 201 $\pm$ 288<br>57 (20-220)                       |
| <b>Composite disease activity assessment§<br/>(n, active disease (%))</b> |                                                                                     | 78 (51%)                                             | 47 (44%)                                                                                                                                                     | 19 (41%)                                           |
| <b>Corticosteroids^</b>                                                   | Current (n, %)<br>Median, IQR<br>Use $\geq$ 12 months (n, %)                        | 45 (29%)<br>6 (1-24)<br>64 (42%)                     | 31 (29%)<br>6 (0.6-24)<br>47 (44%)                                                                                                                           | 14 (30%)<br>6 (2.7-18)<br>17 (37%)                 |
| <b>Biologic therapy (n, %)</b>                                            | Overall<br>Infliximab<br>Adalimumab<br>Vedolizumab                                  | 61 (40%)<br>40 (26%)<br>19 (12%)<br>2 (1%)           | 55 (51%)<br>36 (33%)<br>18 (17%)<br>1 (1%)                                                                                                                   | 6 (13%)<br>4 (9%)<br>1 (2%)<br>1 (2%)              |
| <b>5-ASA therapy (n, %)</b>                                               |                                                                                     | 70 (45%)                                             | 35 (32%)                                                                                                                                                     | 35 (76%)                                           |
| <b>Immunomodulator (n, %)</b>                                             | Overall<br>Azathioprine<br>Mercaptopurine<br>Methotrexate<br>Thiopurine/allopurinol | 86 (56%)<br>60 (39%)<br>6 (4%)<br>3 (2%)<br>17 (11%) | 65 (60%)<br>45 (42%)<br>5 (5%)<br>2 (2%)<br>13 (9%)                                                                                                          | 21 (46%)<br>15 (33%)<br>1 (2%)<br>1 (2%)<br>4 (9%) |
| <b>International Physical Activity Questionnaire¶<br/>Continuous</b>      | Mean $\pm$ SD<br>Median, IQR                                                        | 4310 $\pm$ 5895<br>2160 (693- 5664)                  | 4408 $\pm$ 6259<br>1671 (816- 5163)                                                                                                                          | 4997 $\pm$ 5194<br>3144 (1451- 7461)               |

|                                                                         |                             |                   |                   |                  |
|-------------------------------------------------------------------------|-----------------------------|-------------------|-------------------|------------------|
| Categorical                                                             | Low                         | 64 (42%)          | 49 (45%)          | 15 (33%)         |
|                                                                         | Medium                      | 38 (25%)          | 24 (22%)          | 14 (30%)         |
|                                                                         | High                        | 32 (21%)          | 22 (20%)          | 10 (22%)         |
| <b>Albumin (g/dL)</b>                                                   | Mean $\pm$ SD               | 40 $\pm$ 5        | 39 $\pm$ 4        | 40 $\pm$ 11      |
|                                                                         | Median, IQR                 | 40 (37-43)        | 40 (36-43)        | 41 (38-44)       |
| <b>Haemoglobin (g/L)</b>                                                | Mean $\pm$ SD               | 140 $\pm$ 15      | 140 $\pm$ 16      | 139 $\pm$ 24     |
|                                                                         | Median, IQR                 | 141 (131-150)     | 140 (129-150)     | 143 (133- 150)   |
| <b>Ferritin (ng/ml)</b>                                                 | Mean $\pm$ SD               | 87 $\pm$ 82       | 83 $\pm$ 88       | 94 $\pm$ 69      |
|                                                                         | Median, IQR                 | 63 (34-106)       | 56 (30-100)       | 85 (35- 136)     |
|                                                                         | Iron deficient              | 17 (11%)          | 13 (12%)          | 4 (9%)           |
| <b>Calcium (mmol/L)</b>                                                 | Mean $\pm$ SD               | 2.36 $\pm$ 0.11   | 2.36 $\pm$ 0.11   | 2.36 $\pm$ 0.10  |
|                                                                         | Median, IQR                 | 2.36 (2.29- 2.43) | 2.36 (2.29- 2.42) | 2.37 (2.29-2.43) |
| <b>Vitamin D nmol/ml</b>                                                | Mean $\pm$ SD               | 67 $\pm$ 40       | 64 $\pm$ 28       | 75 $\pm$ 57      |
|                                                                         | Median, IQR                 | 63 (43-84)        | 63 (42-84)        | 63 (51-84)       |
|                                                                         | Vitamin D deficient# n, (%) | 61 (40%)          | 44 (41%)          | 17 (37%)         |
|                                                                         | Vitamin D replacement n (%) | 59 (38%)          | 43 (40%)          | 16 (36%)         |
| <b>Quality of life (Short Inflammatory Bowel Disease Questionnaire)</b> |                             |                   |                   |                  |
|                                                                         | Mean $\pm$ SD               | 50 $\pm$ 12       | 49 $\pm$ 13       | 51 $\pm$ 11      |
|                                                                         | Median, IQR                 | 52 (43-59)        | 52 (41- 60)       | 53 (46-59)       |

**Table legend:** Data presented as mean  $\pm$  standard deviation (SD), median (interquartile range (IQR)), counts and percentage. CDAI, Crohn's Disease Activity Index; §Composite disease activity assessment using clinical indices (CDAI or Partial Mayo) and biomarker of inflammation (faecal calprotectin and C-reactive protein). ^Cumulative months equivalent to prednisolone  $\geq$ 10mg daily. ¶International Physical Activity Questionnaire (Short). #Low Vitamin D level classified as <50 nmol/L, vitamin D supplementation ( $\geq$ 1000 IU/day).

**Supplementary Table 2: Body mass index and waist circumference by age as compared to data from the Australian Bureau of Statistic National Health Survey First Results 2014,2015**

|                            | Australian Health Survey 2014-2015 |                             |                      | IBD Cohort (24 months) |                     |                             |                      |
|----------------------------|------------------------------------|-----------------------------|----------------------|------------------------|---------------------|-----------------------------|----------------------|
| <b>Body mass index</b>     |                                    |                             |                      |                        |                     |                             |                      |
|                            | Overall (mean)                     | Obese (%)                   | Overweight/obese (%) | Patient number         | Overall (mean ± SD) | Obese (%)                   | Overweight/obese (%) |
| Age 18-25                  | 25.2                               | 17.1%                       | 38.9%                | n = 17                 | 24.8 ± 5.5          | 17.6%                       | 41.2%                |
| Male                       | 25.5                               | 17.3%                       | 43.8%                | n= 10                  | 25.9 ± 6.5          | 30%                         | 50%                  |
| Female                     | 24.8                               | 17.3%                       | 33.3%                | n= 7                   | 23.1 ± 3.5          | 0%                          | 28.6%                |
| Age 25-35                  | 26.2                               | 19.0%                       | 52.4%                | n= 38                  | 26.7 ± 4.1          | 21.1%                       | 55.3%                |
| Male                       | 26.9                               | 20.8%                       | 62.5%                | n= 25                  | 26.4 ± 3.7          | 20%                         | 56%                  |
| Female                     | 25.5                               | 17.3%                       | 42.5%                | n=13                   | 27.3 ± 4.9          | 23.1%                       | 53.9%                |
| Age 35-45                  | 27.6                               | 28.6%                       | 65.9%                | n= 35                  | 28.8 ± 6.5          | 34.3%                       | 68.6%                |
| Male                       | 27.7                               | 26.7%                       | 74.3%                | n= 19                  | 27.5 ± 5.9          | 21.1%                       | 63.2%                |
| Female                     | 27.6                               | 30.7%                       | 58.1%                | n= 16                  | 30.5 ± 7.1          | 50%                         | 75%                  |
| Age 45-55                  | 28.3                               | 33%                         | 70.6%                | n= 20                  | 30.3 ± 5.4          | 55%                         | 80%                  |
| Male                       | 28.6                               | 33.2%                       | 79.8%                | n= 12                  | 31.6 ± 4.7          | 58.3%                       | 91.7%                |
| Female                     | 27.9                               | 33%                         | 61.9%                | n=8                    | 28.3 ± 6.1          | 50.0%                       | 62.5%                |
| <b>Waist circumference</b> |                                    |                             |                      |                        |                     |                             |                      |
|                            | Overall (mean)                     | At risk waist circumference |                      | Patient number         | Overall (mean ± SD) | At risk waist circumference |                      |
| Age 18-25                  |                                    |                             |                      | n = 17                 | 88.0 ± 14.6         |                             |                      |
| Male                       | 88                                 | 27.3%                       |                      | n= 10                  | 93.4 ± 14.9         | 50%                         |                      |
| Female                     | 79.4                               | 34.5%                       |                      | n= 7                   | 80.2 ± 11.1         | 42.9%                       |                      |
| Age 25-35                  |                                    |                             |                      | n= 38                  | 91.0 ± 11.7         |                             |                      |
| Male                       | 92.9                               | 41.7%                       |                      | n= 25                  | 93.3 ± 11.9         | 40%                         |                      |
| Female                     | 82.3                               | 49.1%                       |                      | n=13                   | 86.6 ± 10.4         | 69.2%                       |                      |
| Age 35-45                  |                                    |                             |                      | n= 35                  | 97.0 ± 15.4         |                             |                      |
| Male                       | 96.5                               | 55.7%                       |                      | n= 19                  | 98.1 ± 15.7         | 47.4%                       |                      |

|           |       |       |       |               |       |
|-----------|-------|-------|-------|---------------|-------|
| Female    | 87.5  | 66.9% | n= 16 | 95.7 ± 15.5   | 75%   |
| Age 45-55 |       |       | n= 20 | 100.3 ± 14.27 |       |
| Male      | 100.1 | 69.8% | n= 12 | 105.7 ± 9.97  | 91.7% |
| Female    | 89.1  | 71.2% | n=8   | 92.13 ± 16.45 | 87.5% |

**Table legend:** IBD cohort body composition data derived from 24-month dataset. Data presented as mean ± standard deviation, median (interquartile range), counts and percentage. SD, standard deviation. Comparative data derived from the Australian Bureau of Statistics National Health Survey 2014-2015

URL:<http://www.abs.gov.au/ausstats/abs@.nsf/Lookup/by%20Subject/4364.0.55.001~2014-15~Main%20Features~Key%20findings~1>. Overweight and obese characterisation according to WHO criteria. At risk waist circumference defined as >80cm for women and >94cm for men.

**Supplementary Table 3: Clinical associations with serial visceral adipose tissue (VHI)<sup>^</sup> measurements over 24 months**

| Variable                          |                                                        | Univariable                 | P value | Full multivariable model   |         |
|-----------------------------------|--------------------------------------------------------|-----------------------------|---------|----------------------------|---------|
|                                   |                                                        | Est. (95% CI)               |         | Est. (95% CI)              | P value |
| Time                              | Repeated measures over 24m                             | 0.07 [0.02, 0.13]           | 0.006   | -0.015 [-0.072, 0.043]     | 0.61    |
| Demographics                      | Age at study entry                                     | 0.062 [0.044, 0.080]        | <0.0001 | 0.040 [0.023, 0.057]       | <0.0001 |
|                                   | Gender (Male vs. female)                               | 0.7 [0.3, 1.1]              | 0.0009  | 0.67 [0.39, 0.95]          | <0.0001 |
| IBD-related factors               | IBD phenotype (Ulcerative colitis vs. Crohn's disease) | -0.26 [-0.72, 0.20]         | 0.25    | -0.19 [-0.47, 0.09]        | 0.16    |
|                                   | IBD disease duration                                   | 0.003 [0.0011, 0.005]       | 0.002   | -0.0007 [-0.0022, 0.0009]  | 0.36    |
|                                   | Faecal calprotectin (µg/g)                             | -0.00016 [-0.00042, 0.0001] | 0.2     | 0.0000 [-0.00027, 0.00026] | 0.97    |
|                                   | C- reactive protein (mg/L)                             | -0.0009 [-0.0054, 0.0036]   | 0.69    | 0.0007 [-0.0038, 0.0052]   | 0.75    |
|                                   | Steroid use                                            | -0.03 [-0.18, 0.12]         | 0.65    | 0.05 [-0.10, 0.20]         | 0.50    |
|                                   | Biologic therapy                                       | 0.06 [-0.06, 0.19]          | 0.31    | 0.00 [-0.11, 0.11]         | 0.95    |
|                                   | Immunomodulator therapy                                | 0.07 [-0.03, 0.17]          | 0.17    | 0.011 [-0.064, 0.086]      | 0.78    |
| Lifestyle and nutritional factors | Smoking status<br>Current vs. Never                    | 0.50 [0.0, 1.0]             | 0.04    | -0.08 [-0.43, 0.28]        | 0.91    |
|                                   | Ex vs. Never                                           | 0.50 [0.0, 1.0]             |         | -0.03 [-0.34, 0.28]        |         |
|                                   | Excess alcohol intake¶                                 | 0.6 [-0.4, 1.7]             | 0.23    | 0.20 [-0.44, 0.84]         | 0.51    |
|                                   | Vitamin D level (nmol/ml)                              | -0.0019 [-0.0045, 0.0008]   | 0.17    | -0.0022 [-0.0046, -0.0002] | 0.06    |
|                                   | Habitual exercise (IPAQ score, continuous)§            | 0.001 [-0.008, 0.010]       | 0.81    | -0.0008 [-0.0089, 0.0074]  | 0.82    |

|                          |                                             |                        |         |                        |          |
|--------------------------|---------------------------------------------|------------------------|---------|------------------------|----------|
|                          | Albumin (g/dL)                              | -0.002 [-0.019, 0.016] | 0.86    | -0.004 [-0.021, 0.013] | 0.66     |
| Body composition factors | Body mass index (BMI)                       | 0.12 [0.10, 0.14]      | <0.0001 | 0.08 [0.06, 0.11]      | <0.0001* |
|                          | Waist circumference                         | 0.035 [0.029, 0.042]   | <0.0001 | 0.015 [0.005, 0.026]   | 0.003*   |
|                          | Waist:hip ratio                             | 1.1 [0.4, 1.7]         | 0.0009  | -0.2 [-1.0, 0.6]       | 0.54     |
|                          | Grip strength (pounds per square inch, PSI) | 0.001 [-0.009, 0.011]  | 0.84    | -0.007 [-0.016, 0.002] | 0.13     |

Table legend: <sup>^</sup>VHI, visceral adipose tissue area (cm<sup>3</sup>)/ height (m)<sup>2</sup>, log-transformed prior to analysis; ¶Defined according to Australian healthy Drinking guidelines; §International Physical Activity Questionnaire for assessment of habitual physical activity. Linear mixed effects regression models with missing data imputed with cohort means.

**Supplementary Table 4: Clinical associations with serial fat mass index (FMI) measurements over 24 months**

| Variable                          |                                                         | Univariable                | P value | Full multivariable model    |         |
|-----------------------------------|---------------------------------------------------------|----------------------------|---------|-----------------------------|---------|
|                                   |                                                         | Est. (95% CI)              |         | Est. (95% CI)               | P value |
| Time                              | Repeated measures over 24m                              | 0.34 [0.18, 0.50]          | <0.0001 | 0.04 [-0.13, 0.20]          | 0.65    |
| Demographics                      | Age at study entry                                      | 0.18 [0.11, 0.25]          | <0.0001 | 0.024 [-0.010, 0.058]       | 0.17    |
|                                   | Gender (Male vs. female)                                | -2.7 [-4.2, -1.2]          | 0.0004  | -2.2 [-2.8, -1.6]           | <0.0001 |
| IBD-related factors               | IBD phenotype (Ulcerative colitis vs. Crohn's disease)  | -0.7 [-2.5, 1.0]           | 0.41    | -0.16 [-0.73, 0.41]         | 0.56    |
|                                   | IBD disease duration                                    | 0.011 [0.004, 0.019]       | 0.002   | -0.0009 [-0.0040, 0.0021]   | 0.53    |
|                                   | Faecal calprotectin (µg/g)                              | -0.0009 [-0.0017, -0.0001] | 0.02    | 0.00007 [-0.00063, 0.00078] | 0.82    |
|                                   | C- reactive protein (mg/L)                              | -0.007 [-0.019, 0.005]     | 0.24    | -0.001 [-0.011, 0.010]      | 0.93    |
|                                   | Steroid use                                             | -0.11 [-0.58, 0.36]        | 0.64    | 0.34 [-0.08, 0.75]          | 0.09    |
|                                   | Biologic therapy                                        | 0.31 [-0.11, 0.73]         | 0.14    | 0.14 [-0.12, 0.41]          | 0.26    |
|                                   | Immunomodulator therapy                                 | 0.24 [-0.11, 0.58]         | 0.17    | -0.09 [-0.25, 0.08]         | 0.24    |
| Lifestyle and nutritional factors | Smoking status<br>Current vs. Never                     | 0.5 [-1.6, 2.6]            | 0.65    | -0.28 [-0.98, 0.43]         | 0.07    |
|                                   | Ex vs. Never                                            | 0.8 [-1.0, 2.7]            |         | -0.7 [-1.3, -0.1]           |         |
|                                   | Excess alcohol intake <sup>^</sup>                      | -0.6 [-4.7, 3.4]           | 0.75    | 0.0 [-1.3, 1.3]             | 0.97    |
|                                   | Vitamin D level (nmol/ml)                               | -0.0003 [-0.0084, 0.0079]  | 0.95    | -0.007 [-0.013, -0.001]     | 0.02    |
|                                   | Habitual exercise (IPAQ score, continuous) <sup>§</sup> | -0.011 [-0.039, 0.018]     | 0.46    | -0.020 [-0.042, 0.003]      | 0.07    |
|                                   | Albumin (g/dL)                                          | 0.029 [-0.027, 0.085]      | 0.30    | -0.002 [-0.049, 0.044]      | 0.91    |



|                          |                                             |                        |         |                         |          |
|--------------------------|---------------------------------------------|------------------------|---------|-------------------------|----------|
| Body composition factors | Body mass index (BMI)                       | 0.57 [0.52, 0.62]      | <0.0001 | 0.52 [0.45, 0.59]       | <0.0001* |
|                          | Waist circumference                         | 0.12 [0.10, 0.14]      | <0.0001 | 0.07 [0.04, 0.10]       | <0.0001* |
|                          | Waist:hip ratio (WHR)                       | 2.6 [0.6, 4.5]         | 0.008   | -3.0 [-5.2, -0.8]       | 0.006*   |
|                          | Grip strength (pounds per square inch, PSI) | -0.033 [-0.068, 0.001] | 0.06    | -0.044 [-0.066, -0.021] | <0.0001* |

**Table legend.** ^Excess alcohol use defined according to Australian healthy Drinking guidelines; §IPAQ, International Physical Active Questionnaire; FMI, fat mass index (kg/ height m<sup>2</sup>); ASMI, appendicular skeletal muscle index (kg/ height m<sup>2</sup>); Linear mixed effects regression models with missing data imputed with cohort means.

**Supplementary Table 5: Clinical associations with serial appendicular skeletal muscle index (ASMI) measurements over 24 months**

| Variable                          |                                                         | Univariable                   |         | Full multivariable model      |          |
|-----------------------------------|---------------------------------------------------------|-------------------------------|---------|-------------------------------|----------|
|                                   |                                                         | Est. (95% CI)                 | P value | Est. (95% CI)                 | P value  |
| Time                              | Repeated measures over 24m                              | -0.06 [-0.11, -0.02]          | 0.006   | -0.16 [-0.21, -0.10]          | <0.0001* |
| Demographics                      | Age at study entry                                      | 0.010 [-0.013, 0.033]         | 0.40    | 0.005 [-0.010, 0.021]         | 0.53     |
|                                   | Gender (Male vs. female)                                | 1.5 [1.0, 1.9]                | <0.0001 | 1.2 [0.9, 1.4]                | <0.0001* |
| IBD-related factors               | IBD phenotype (Ulcerative colitis vs. Crohn's disease)  | 0.07 [-0.49, 0.62]            | 0.81    | 0.01 [-0.25, 0.28]            | 0.93     |
|                                   | IBD disease duration                                    | -0.0009 [-0.0031, 0.0013]     | 0.43    | 0.0003 [-0.0011, 0.0018]      | 0.61     |
|                                   | Faecal calprotectin (µg/g)                              | -0.00047 [-0.00070, -0.00025] | <0.0001 | -0.00043 [-0.00067, -0.00018] | 0.0004*  |
|                                   | C- reactive protein (mg/L)                              | -0.0020 [-0.0055, 0.0015]     | 0.25    | -0.0001 [-0.0037, 0.0035]     | 0.95     |
|                                   | Steroid use                                             | -0.05 [-0.19, 0.08]           | 0.43    | -0.05 [-0.19, 0.09]           | 0.50     |
|                                   | Biologic therapy                                        | -0.06 [-0.18, 0.07]           | 0.37    | -0.04 [-0.15, 0.06]           | 0.37     |
|                                   | Immunomodulator therapy                                 | 0.08 [-0.02, 0.18]            | 0.11    | 0.07 [0.00, 0.14]             | 0.05     |
| Lifestyle and nutritional factors | Smoking status<br>Current vs. Never                     | 0.10 [-0.55, 0.75]            | 0.22    | -0.06 [-0.39, 0.27]           | 0.50     |
|                                   | Ex vs. Never                                            | 0.5 [-0.1, 1.1]               |         | 0.19 [-0.16, 0.40]            |          |
|                                   | Excess alcohol intake <sup>^</sup>                      | -0.2 [-1.5, 1.0]              | 0.69    | -0.7 [-1.3, -0.1]             | 0.02*    |
|                                   | Vitamin D level (nmol/ml)                               | -0.0004 [-0.0027, 0.0020]     | 0.75    | 0.0008 [-0.0014, 0.0031]      | 0.43     |
|                                   | Habitual exercise (IPAQ score, continuous) <sup>§</sup> | 0.003 [-0.005, 0.012]         | 0.44    | 0.004 [-0.004, 0.012]         | 0.32     |

|                          |                                             |                      |         |                        |          |
|--------------------------|---------------------------------------------|----------------------|---------|------------------------|----------|
|                          | Albumin (g/dL)                              | 0.017 [0.000, 0.033] | 0.04    | -0.001 [-0.017, 0.016] | 0.96     |
| Body composition factors | Body mass index (BMI)                       | 0.10 [0.08, 0.12]    | <0.0001 | 0.13 [0.11, 0.15]      | <0.0001* |
|                          | Grip strength (pounds per square inch, PSI) | 0.019 [0.009, 0.030] | 0.0007  | 0.020 [0.011, 0.028]   | <0.0001* |

**Table legend:** ^Excess alcohol use defined according to Australian healthy Drinking guidelines; §IPAQ, International Physical Active Questionnaire; FMI, fat mass index (kg/ height m<sup>2</sup>); ASMI, appendicular skeletal muscle index (kg/ height m<sup>2</sup>); Linear mixed effects regression models with missing data imputed with cohort means.

**Supplementary Table 6: Clinical associations with serial bone mineral density measurements (lumbar spine *t*- score) over 24 months**

| Variable                          |                                                         | Univariable                 |         | Full multivariable model    |         |
|-----------------------------------|---------------------------------------------------------|-----------------------------|---------|-----------------------------|---------|
|                                   |                                                         | Est. (95% CI)               | P value | Est. (95% CI)               | P value |
| Time                              | Repeated measures over 24m                              | 0.012 [-0.015, 0.040]       | 0.38    | 0.06 [0.01, 0.10]           | 0.01*   |
| Demographics                      | Age at study entry                                      | -0.008 [-0.025, 0.010]      | 0.39    | -0.006 [-0.034, 0.023]      | 0.68    |
|                                   | Gender (Male vs. female)                                | -0.34 [-0.75, 0.07]         | 0.10    | -0.38 [-0.82, 0.07]         | 0.08    |
| IBD-related factors               | IBD phenotype (ulcerative colitis vs. Crohn's disease)  | -0.17 [-0.64, 0.29]         | 0.46    | -0.26 [-0.74, 0.21]         | 0.26    |
|                                   | IBD disease duration                                    | -0.0012 [-0.0028, 0.0004]   | 0.15    | -0.0031 [-0.0057, -0.0005]  | 0.01*   |
|                                   | Faecal calprotectin ( $\mu\text{g/g}$ )                 | 0.00002 [-0.00013, 0.00016] | 0.83    | 0.00004 [-0.00013, 0.00021] | 0.61    |
|                                   | C- reactive protein (mg/L)                              | -0.0019 [-0.0040, 0.0001]   | 0.06    | -0.0019 [-0.0042, 0.0004]   | 0.08    |
| IBD therapy                       | Steroid use                                             | 0.07 [-0.01, 0.15]          | 0.07    | 0.10 [0.01, 0.18]           | 0.02*   |
|                                   | Biologic therapy                                        | 0.07 [0.00, 0.14]           | 0.04    | 0.08 [0.01, 0.16]           | 0.02*   |
|                                   | Immunomodulator therapy                                 | 0.013 [-0.054, 0.080]       | 0.69    | -0.022 [-0.093, 0.050]      | 0.53    |
| Lifestyle and nutritional factors | Smoking status<br>Current vs. Never                     | -0.33 [-0.87, 0.21]         | 0.35    | -0.23 [-0.83, 0.37]         | 0.61    |
|                                   | Ex vs. Never                                            | 0.09 [-0.40, 0.57]          |         | 0.06 [-0.45, 0.57]          |         |
|                                   | Excess alcohol intake <sup>^</sup>                      | -0.9 [-1.9, 0.1]            | 0.07    | -0.2 [-1.3, 0.8]            | 0.65    |
|                                   | Vitamin D level (nmol/ml)                               | -0.0004 [-0.0018, 0.0009]   | 0.51    | -0.0003 [-0.0017, 0.0011]   | 0.70    |
|                                   | Habitual exercise (IPAQ score, continuous) <sup>§</sup> | 0.0003 [-0.0044, 0.0051]    | 0.88    | 0.0000 [-0.0048, 0.0048]    | 1.00    |

|                          |                                             |                        |      |                        |      |
|--------------------------|---------------------------------------------|------------------------|------|------------------------|------|
|                          | Calcium                                     | -0.22 [-0.58, 0.14]    | 0.23 | -0.30 [-0.71, 0.10]    | 0.12 |
|                          | Albumin (g/dL)                              | 0.002 [-0.008, 0.011]  | 0.70 | 0.006 [-0.005, 0.018]  | 0.25 |
| Body composition factors | BMI                                         | 0.004 [-0.009, 0.017]  | 0.51 | 0.007 [-0.011, 0.025]  | 0.42 |
|                          | Grip strength (pounds per square inch, PSI) | 0.006 [0.000, 0.012]   | 0.06 | 0.005 [-0.001, 0.012]  | 0.10 |
|                          | Fat mass index (FMI)                        | 0.007 [-0.012, 0.026]  | 0.44 | -0.006 [-0.034, 0.021] | 0.65 |
|                          | Appendicular skeletal muscle index (ASMI)   | -0.003 [-0.067, 0.061] | 0.93 | 0.005 [-0.073, 0.083]  | 0.89 |
|                          | Functional sarcopenia¶                      | -0.07 [-0.20, 0.06]    | 0.29 | -0.09 [-0.23, 0.05]    | 0.19 |

**Table legend:** ^Excess alcohol use defined according to Australian healthy Drinking guidelines; §IPAQ, International Physical Active Questionnaire; FMI, fat mass index (kg/ height m<sup>2</sup>); ASMI, appendicular skeletal muscle index (kg/ height m<sup>2</sup>); ¶functional sarcopenia, low ASMI and grip strength  $\geq 1$  standard deviation below mean.

\*Significant P value (<0.05;) Linear mixed effects regression models with missing data imputed with cohort means.
